# Supplementary material for: Magnetic Beads inside Droplets for Agitation and Splitting Manipulation by Utilizing a Magnetically Actuated Platform
Source: MDPI journal article supplement (doi:10.3390/mi14071349), 2023-06-30
Supplement: s1 [file s1]

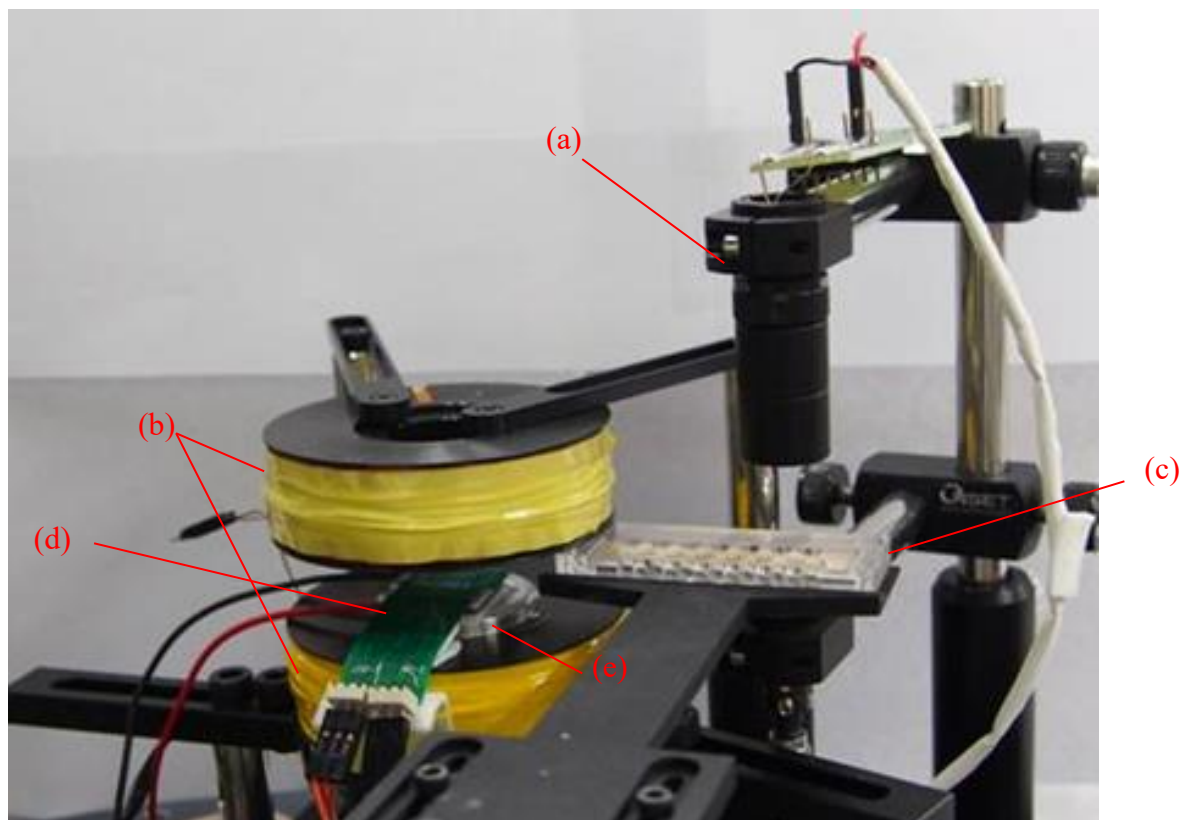

Figure S1. Experimental setup of the magnetically actuated platform. a: digital camera attached with a CCD; b: Helmholtz coil; c: Cartridge; d: a two-layer 6×1 coil array chip; and (e) a thermoelectric module.
