# Supplementary material for: Magnetic Beads inside Droplets for Agitation and Splitting Manipulation by Utilizing a Magnetically Actuated Platform
Source: MDPI journal article supplement (doi:10.3390/mi14071349), 2023-06-30
Supplement: s1 [file s1]

We simplify the 8-winding as 8-loop square coils where at the same center as illustrated as Figure A.1.

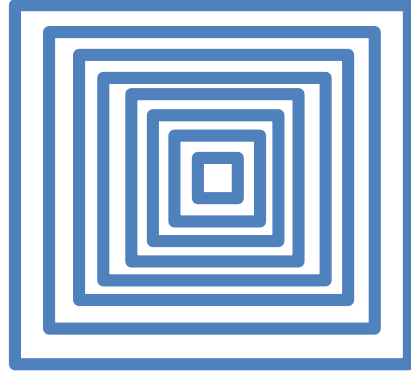

Figure A-1: A schematic representation of the eight-loop square coils.

According to Biot-Savart's law, the magnetic field  $d\vec{B}$  at any point  $P$  due to element  $d\vec{l}$  of a current-carrying wire is given by:

$$\vec{B} = \frac{\mu_0}{4\pi} \oint_C \frac{I d\vec{l} \times \vec{r}}{|\vec{r}|^3} \quad (\text{A-1})$$

In this case,  $d\vec{l}$  is the vector of the current element in the direction of current flow into the square-shaped conductor (Figure A-2(a)), and  $\vec{r}$  is the vector of the distant point as shown in Figure A-2(b). So, magnetic field at that point  $P$  is determined by:

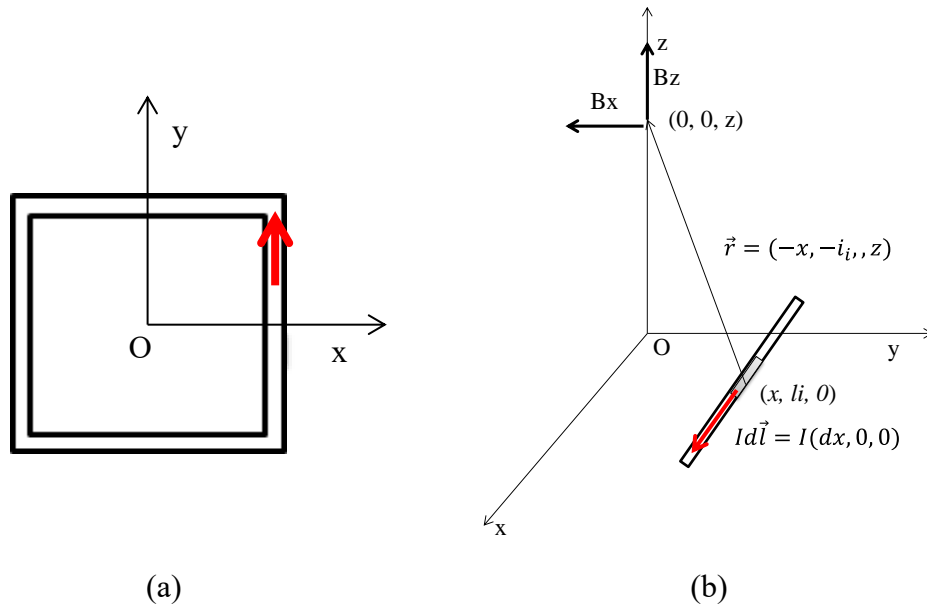

Figure A-2: (a) Current  $I$  flow through a single square-shape loop, and (b) the current element  $d\vec{l}$  flow through a segment of conducting line.

The current element ( $d\vec{l}$ ) flowed through a segment of  $d\vec{l}$  is displayed as follows:

$$d\vec{l} = Id\vec{l} = Idx\hat{i} \text{ (or } Idy\hat{j}) \quad (\text{A-2})$$

The quantities of  $\vec{r}$  and  $|\vec{r}|$  is then calculated as

$$\vec{r} = (-l_i, -y, z) \quad (\text{A-3})$$

$$|\vec{r}| = \sqrt{l_i^2 + z^2 + y^2} \quad (\text{A-4})$$

Therefore, the outer product of  $d\vec{l} \times \vec{r}$  is calculated as

$$d\vec{l} \times \vec{r} = \begin{vmatrix} \hat{i} & \hat{j} & \hat{k} \\ dx & 0 & 0 \\ -x & -l_i & z \end{vmatrix} = -(z\hat{i} + l_i\hat{k})dx \quad (\text{A-5})$$

Substituting Eqs.(A-4) and (A-5) into Eq.(A-1), that can be obtained as

$$B_Z = \frac{\mu_o I}{4\pi} \int_{-l_i}^{l_i} \frac{l_i dx_i}{(l_i^2 + z^2 + x_i^2)^{3/2}} \quad (\text{A-6})$$

Here,  $x_i$  represents as  $x$  or  $y$ . Eq.(A-6) is also expressed as follows:

$$B_Z = \frac{\mu_o I}{4\pi} \int_{-l_i}^{l_i} \frac{l_i dx_i}{(l_i^2 + z^2)^{3/2} \left(1 + \frac{x_i^2}{l_i^2 + z^2}\right)^{3/2}} \quad (\text{A-7})$$

Suppose  $\tan \mu = \frac{x_i}{\sqrt{l_i^2 + z^2}}$  and differentiating both sides of the equation, we can get

$$\sec^2 \mu d\mu = \frac{dx_i}{\sqrt{l_i^2 + z^2}} \quad (\text{A-8})$$

Substituting Eq.(A-8) into Eq.(A-7), and then Eq.(A-7) can be obtained as

$$B_Z = \frac{\mu_o I}{4\pi} \int_{-\mu_i}^{\mu_i} \frac{l_i \sqrt{l_i^2 + z^2} \sec^2 \mu d\mu}{(l_i^2 + z^2)^{3/2} (1 + \tan^2 \mu)^{3/2}} \quad (\text{A-9})$$

Eq.(A-9) can be simplified as

$$B_Z = \frac{\mu_o I}{4\pi} \int_{-\mu_i}^{\mu_i} \frac{l_i \sec^2 \mu d\mu}{(l_i^2 + z^2) (\sec^2 \mu)^{3/2}} \quad (\text{A-10})$$

Eq.(A-10) can be integrated as bellows:

$$B_Z = \frac{\mu_o I}{4\pi} \int_{-\mu_i}^{\mu_i} \frac{l_i \cos \mu d\mu}{(l_i^2 + z^2)} = \frac{\mu_o I}{4\pi} \frac{l_i \cdot \sin \mu}{(l_i^2 + z^2)} \Big|_{-\mu_i}^{\mu_i} \quad (\text{A-11})$$

Because of  $\tan \mu = \frac{x_i}{\sqrt{l_i^2 + z^2}}$ , therefore,  $\sin \mu = \frac{x_i}{\sqrt{l_i^2 + z^2 + x_i^2}}$ . Substituting  $\sin \mu$  into (A-

11), Eq.(A-11) can be obtained as

$$B_Z = \frac{\mu_o I}{4\pi} \frac{2l_i^2}{(l_i^2 + z^2) (2l_i^2 + z^2)^{1/2}} \quad (\text{A-12})$$

The formula to calculate the magnetic field at any particular point on the of the eight square-shape loops of side length  $l_i$  and current carrying I, at a point P far from it at a distance z-axis is given by:

$$B_Z = \frac{4\mu_0 I}{4\pi} \sum_{i=1}^{N=8} \frac{2l_i^2}{(l_i^2 + z^2)(2l_i^2 + z^2)^{1/2}} \quad (\text{A-13})$$
