# Supplementary material for: Magnetic Beads inside Droplets for Agitation and Splitting Manipulation by Utilizing a Magnetically Actuated Platform
Source: Micromachines (Basel). 2023 Jun 30;14(7):1349. doi: 10.3390/mi14071349 (PMC10384566; doi:10.3390/mi14071349)
Supplement: Supplementary file 1 [file micromachines-14-01349-s001.zip]

Archive with 5 entries (5 files):
- supplementary document S1.pdf
- supplementary document S2.pdf
- supplementary document S3.pdf
- supplementary Video S4.mp4
- supplementary Video S5.mp4
